# Supplementary material for: Matrix isolation and computational study of the photochemistry of p-azidoaniline
Source: Royal Society of Chemistry journal article supplement (doi:10.1039/b511229j), 2005-12-15
Supplement: b511229j.pdf [file b511229j.pdf]

# Matrix isolation and computational study of the photochemistry of *p*-azidoaniline

Elena A. Pritchina, Nina P. Gritsan, Thomas Bally

## SUPPORTING INFORMATION, PART 2 (TABLES)

**Table S1. Vertical excitation energies of triplet *p*-aminophenylnitrene calculated using CASPT2 method (symmetry  $C_s$ ).<sup>a</sup>**

| state    | $\Delta E_{\text{CASSCF}}$ ,<br>eV | $\Delta E_{\text{CASPT2}}$ ,<br>eV | ref.<br>weight | $\lambda$ ,<br>nm | $f$                   | Major<br>configurations                                                                     |
|----------|------------------------------------|------------------------------------|----------------|-------------------|-----------------------|---------------------------------------------------------------------------------------------|
| $1^3A''$ | 0.0                                | 0.0                                | 0.78           |                   |                       | 82% of ground<br>configuration                                                              |
| $1^3A'$  | 3.05                               | 2.89                               | 0.76           | 429               | $1.3 \times 10^{-3}$  | 41%: $9a'' \rightarrow 19a'$<br>31%: $19a' \rightarrow 11a''$                               |
| $2^3A''$ | 3.27                               | 2.95                               | 0.77           | 420               | $1.5 \times 10^{-2}$  | 49%: $18a' \rightarrow 19a'$<br>28%: $19a' \rightarrow 20a'$                                |
| $2^3A'$  | 5.45                               | 3.68                               | 0.73           | 337               | $4.6 \times 10^{-2}$  | 32%: $9a'' \rightarrow 19a'$<br>33%: $19a' \rightarrow 11a''$                               |
| $3^3A'$  | 3.89                               | 3.96                               | 0.76           | 313               | $2.6 \times 10^{-10}$ | 79%: $18a' \rightarrow 10a''$                                                               |
| $4^3A'$  | 4.36                               | 4.15                               | 0.76           | 298               | $1.4 \times 10^{-2}$  | 81%: $16a' \rightarrow 10a''$                                                               |
| $3^3A''$ | 4.62                               | 4.45                               | 0.77           | 279               | $3.5 \times 10^{-3}$  | 63%: $9a'' \rightarrow 11a''$                                                               |
| $4^3A''$ | 6.52                               | 4.60                               | 0.74           | 269               | $3.2 \times 10^{-1}$  | 26%: $18a' \rightarrow 19a'$<br>30%: $19a' \rightarrow 20a'$                                |
| $5^3A''$ | 5.23                               | 4.61                               | 0.77           | 269               | $6.1 \times 10^{-3}$  | 39%: $9a'' \rightarrow 11a''$<br>24%: $15a' \rightarrow 19a'$                               |
| $6^3A''$ | 4.92                               | 4.65                               | 0.77           | 267               | $1.5 \times 10^{-5}$  | 60%: $9a'' \rightarrow 10a''$<br>13%: $18a' \rightarrow 19a'$<br>+ $9a'' \rightarrow 10a''$ |
| $7^3A''$ | 5.26                               | 4.84                               | 0.76           | 256               | $1.7 \times 10^{-3}$  | 77%: $16a' \rightarrow 19a'$                                                                |
| $5^3A'$  | 5.69                               | 5.65                               | 0.76           | 219               | $1.4 \times 10^{-5}$  | 67%: $19a' \rightarrow 10a''$<br>+ $9a'' \rightarrow 11a''$                                 |

<sup>a</sup> based on a CASSCF(12,12)/ANO-S wavefunction at the CASSCF(8,8)/6-31G(d) geometry; A' states were calculated with a level shift of 0.10 h, A'' states - with a level shift of 0.20 h.

**Table S2. Dependence of energy and reference weight of CASPT2 states on the level shift for triplet *p*-aminophenylnitrene<sup>a</sup> ( $C_s$ -symmetry).**

| CASPT2 states                         | 1 <sup>1</sup> A'' | 2 <sup>1</sup> A'' | 3 <sup>1</sup> A'' | 4 <sup>1</sup> A'' | 5 <sup>1</sup> A'' | 6 <sup>1</sup> A'' |
|---------------------------------------|--------------------|--------------------|--------------------|--------------------|--------------------|--------------------|
| <b>level shift = 0.00 h</b>           |                    |                    |                    |                    |                    |                    |
| $E_{\text{CASPT2}}, \text{H}$         | -340.604311        | -340.504202        | -340.441194        | -340.436084        | -340.769466        | -340.433844        |
| $\Delta E_{\text{CASPT2}}, \text{eV}$ | 0.000              | 2.724              | 4.439              | 4.578              |                    | 4.639              |
| Ref. Weight                           | 0.749              | 0.446              | 0.619              | 0.347              | 0.001              | 0.741              |
| <b>level shift = 0.05 h</b>           |                    |                    |                    |                    |                    |                    |
| $E_{\text{CASPT2}}, \text{H}$         | -340.603963        | -340.497846        | -340.445576        | -340.450847        | -340.437480        | -340.433462        |
| $\Delta E_{\text{CASPT2}}, \text{eV}$ | 0.000              | 2.888              | 4.309              | 4.167              | 4.530              | 4.640              |
| Ref. Weight                           | 0.757              | 0.735              | 0.701              | 0.509              | 0.728              | 0.750              |
| <b>level shift = 0.10 h</b>           |                    |                    |                    |                    |                    |                    |
| $E_{\text{CASPT2}}, \text{H}$         | -340.602988        | -340.495686        | -340.440384        | -340.472190        | -340.434696        | -340.432371        |
| $\Delta E_{\text{CASPT2}}, \text{eV}$ | 0.000              | 2.920              | 4.425              | 3.559              | 4.580              | 4.643              |
| Ref. Weight                           | 0.764              | 0.752              | 0.753              | 0.586              | 0.750              | 0.758              |
| <b>level shift = 0.15 h</b>           |                    |                    |                    |                    |                    |                    |
| $E_{\text{CASPT2}}, \text{H}$         | -340.601477        | -340.494080        | -340.440179        | -340.437994        | -340.432406        | -340.430714        |
| $\Delta E_{\text{CASPT2}}, \text{eV}$ | 0.000              | 2.922              | 4.389              | 4.449              | 4.601              | 4.647              |
| Ref. Weight                           | 0.771              | 0.760              | 0.755              | 0.712              | 0.760              | 0.755              |
| <b>level shift = 0.20 h</b>           |                    |                    |                    |                    |                    |                    |
| $E_{\text{CASPT2}}, \text{H}$         | -340.599503        | -340.491066        | -340.435909        | -340.430405        | -340.429910        | -340.428572        |
| $\Delta E_{\text{CASPT2}}, \text{eV}$ | 0.000              | 2.951              | 4.452              | 4.601              | 4.615              | 4.651              |
| Ref. Weight                           | 0.778              | 0.771              | 0.770              | 0.736              | 0.769              | 0.773              |
| <b>level shift = 0.00 h</b>           |                    |                    |                    |                    |                    |                    |
| CASPT2 states                         | 7 <sup>1</sup> A'' | 1 <sup>1</sup> A'  | 2 <sup>1</sup> A'  | 3 <sup>1</sup> A'  | 4 <sup>1</sup> A'  | 5 <sup>1</sup> A'  |
| <b>level shift = 0.00 h</b>           |                    |                    |                    |                    |                    |                    |
| $E_{\text{CASPT2}}, \text{H}$         | -340.424738        | -340.498338        | -340.470241        | -340.459211        | -340.452022        | -340.396714        |
| $\Delta E_{\text{CASPT2}}, \text{eV}$ | 4.885              | 2.884              | 3.648              | 3.948              | 4.144              | 5.649              |
| Ref. Weight                           | 0.568              | 0.437              | 0.659              | 0.654              | 0.737              | 0.743              |
| <b>level shift = 0.05 h</b>           |                    |                    |                    |                    |                    |                    |
| $E_{\text{CASPT2}}, \text{H}$         | -340.492415        | -340.498154        | -340.493620        | -340.458554        | -340.451493        | -340.396499        |
| $\Delta E_{\text{CASPT2}}, \text{eV}$ | 3.035              | 2.879              | 3.003              | 3.957              | 4.149              | 5.645              |
| Ref. Weight                           | 0.392              | 0.746              | 0.534              | 0.755              | 0.751              | 0.750              |
| <b>level shift = 0.10 h</b>           |                    |                    |                    |                    |                    |                    |
| $E_{\text{CASPT2}}, \text{H}$         | -340.541135        | -340.496880        | -340.467712        | -340.457530        | -340.450325        | -340.395271        |
| $\Delta E_{\text{CASPT2}}, \text{eV}$ | 1.683              | 2.887              | 3.681              | 3.958              | 4.154              | 5.652              |
| Ref. Weight                           | 0.393              | 0.757              | 0.728              | 0.763              | 0.760              | 0.760              |
| <b>level shift = 0.15 h</b>           |                    |                    |                    |                    |                    |                    |
| $E_{\text{CASPT2}}, \text{H}$         | -340.425987        | -340.495693        | -340.464710        | -340.455969        | -340.448651        | -340.393637        |
| $\Delta E_{\text{CASPT2}}, \text{eV}$ | 4.775              | 2.895              | 3.722              | 3.960              | 4.159              | 5.656              |
| Ref. Weight                           | 0.746              | 0.765              | 0.742              | 0.771              | 0.768              | 0.768              |
| <b>level shift = 0.20 h</b>           |                    |                    |                    |                    |                    |                    |
| $E_{\text{CASPT2}}, \text{H}$         | -340.421655        | -340.492858        | -340.461669        | -340.453944        | -340.446532        | -340.391531        |
| $\Delta E_{\text{CASPT2}}, \text{eV}$ | 4.840              | 2.902              | 3.751              | 3.961              | 4.163              | 5.659              |
| Ref. Weight                           | 0.761              | 0.773              | 0.751              | 0.778              | 0.775              | 0.775              |

<sup>a</sup>The results with level shift 0.20 h and 0.10 h for A'' and A' states are listed in Table S1 of the supporting information, respectively.

**Table S3. Dependence of energy and reference weight of CASPT2 states on the level shift for triplet *p*-aminophenylnitrene<sup>a</sup> ( $C_{2v}$ -symmetry).**

| CASPT2 states                         | $1^3A_2$    | $2^3A_2$    | $3^3A_2$    | $4^3A_2$    | $5^3A_2$    |
|---------------------------------------|-------------|-------------|-------------|-------------|-------------|
| <b>level shift = 0.00 h</b>           |             |             |             |             |             |
| $E_{\text{CASPT2}}, \text{H}$         | -340.601508 | -340.488557 | -340.438401 | -340.439107 | -340.425794 |
| $\Delta E_{\text{CASPT2}}, \text{eV}$ | 0.000       | 3.074       | 4.438       | 4.419       | 4.4781      |
| Ref. Weight                           | 0.749       | 0.468       | 0.499       | 0.722       | 0.160       |
| <b>level shift = 0.05 h</b>           |             |             |             |             |             |
| $E_{\text{CASPT2}}, \text{H}$         | -340.601158 | -340.496922 | -340.443155 | -340.510687 | -340.693264 |
| $\Delta E_{\text{CASPT2}}, \text{eV}$ | 0.000       | 2.836       | 4.300       | 2.462       |             |
| Ref. Weight                           | 0.757       | 0.732       | 0.584       | 0.363       | 0.140       |
| <b>level shift = 0.10 h</b>           |             |             |             |             |             |
| $E_{\text{CASPT2}}, \text{H}$         | -340.600179 | -340.494251 | -340.536053 | -340.437865 | -340.444394 |
| $\Delta E_{\text{CASPT2}}, \text{eV}$ | 0.000       | 2.882       | 1.745       | 4.417       | 4.239       |
| Ref. Weight                           | 0.765       | 0.754       | 0.446       | 0.754       | 0.643       |
| <b>level shift = 0.15 h</b>           |             |             |             |             |             |
| $E_{\text{CASPT2}}, \text{H}$         | -340.598662 | -340.492112 | -340.444793 | -340.435890 | -340.424790 |
| $\Delta E_{\text{CASPT2}}, \text{eV}$ | 0.000       | 2.899       | 4.187       | 4.429       | 4.731       |
| Ref. Weight                           | 0.772       | 0.764       | 0.704       | 0.763       | 0.743       |
| <b>level shift = 0.20 h</b>           |             |             |             |             |             |
| $E_{\text{CASPT2}}, \text{H}$         | -340.596683 | -340.489715 | -340.434337 | -340.433508 | -340.418413 |
| $\Delta E_{\text{CASPT2}}, \text{eV}$ | 0.000       | 2.911       | 4.418       | 4.440       | 4.851       |
| Ref. Weight                           | 0.779       | 0.772       | 0.736       | 0.771       | 0.764       |
| CASPT2 states                         | $1^3B_1$    | $2^3B_1$    | $3^3B_1$    | $4^3B_1$    | $5^3B_1$    |
| <b>level shift = 0.00 h</b>           |             |             |             |             |             |
| $E_{\text{CASPT2}}, \text{H}$         | -340.498726 | -340.467576 | -340.448562 | -340.418487 | -340.401337 |
| $\Delta E_{\text{CASPT2}}, \text{eV}$ | 2.797       | 3.645       | 4.162       | 4.980       | 5.447       |
| Ref. Weight                           | 0.737       | 0.682       | 0.740       | 0.704       | 0.348       |
| <b>level shift = 0.05 h</b>           |             |             |             |             |             |
| $E_{\text{CASPT2}}, \text{H}$         | -340.498309 | -340.466572 | -340.448113 | -340.419420 | -340.410328 |
| $\Delta E_{\text{CASPT2}}, \text{eV}$ | 2.799       | 3.662       | 4.150       | 4.945       | 5.193       |
| Ref. Weight                           | 0.747       | 0.723       | 0.751       | 0.716       | 0.673       |
| <b>level shift = 0.10 h</b>           |             |             |             |             |             |
| $E_{\text{CASPT2}}, \text{H}$         | -340.497135 | -340.465083 | -340.447001 | -340.418085 | -340.403779 |
| $\Delta E_{\text{CASPT2}}, \text{eV}$ | 2.804       | 3.676       | 4.168       | 4.955       | 5.344       |
| Ref. Weight                           | 0.756       | 0.735       | 0.759       | 0.737       | 0.730       |
| <b>level shift = 0.15 h</b>           |             |             |             |             |             |
| $E_{\text{CASPT2}}, \text{H}$         | -340.495401 | -340.462821 | -340.445355 | -340.416231 | -340.399988 |
| $\Delta E_{\text{CASPT2}}, \text{eV}$ | 2.810       | 3.696       | 4.172       | 4.963       | 5.405       |
| Ref. Weight                           | 0.764       | 0.745       | 0.767       | 0.747       | 0.748       |

<sup>a</sup>The results with level shift 0.20 h and 0.10 h for  $A_2$  and  $B_1$  states are listed in Table 1 of the manuscript, respectively.

**Table S4.** Dependence of energy and reference weight of CASPT2 states on the level shift for *cis-p*-aminophenylnitroso oxide<sup>a</sup> (geometry CASSCF(12,12)/6-31G(d))

| CASPT2 states               | 1 <sup>1</sup> A' | 2 <sup>1</sup> A' | 3 <sup>1</sup> A' | 4 <sup>1</sup> A' | 5 <sup>1</sup> A' | 6 <sup>1</sup> A' |
|-----------------------------|-------------------|-------------------|-------------------|-------------------|-------------------|-------------------|
| <b>level shift = 0.00 h</b> |                   |                   |                   |                   |                   |                   |
| E <sub>CASPT2</sub> , H     | -490.619194       | -490.511776       | -490.480913       | -490.475284       | -490.443425       | -490.432613       |
| ΔE <sub>CASPT2</sub> , eV   | 0.000             | 2.923             | 3.763             | 3.330             | 4.783             | 5.077             |
| Ref. Weight                 | 0.695             | 0.659             | 0.573             | 0.650             | 0.547             | 0.391             |
| <b>level shift = 0.05 h</b> |                   |                   |                   |                   |                   |                   |
| E <sub>CASPT2</sub> , H     | -490.618753       | -490.511002       | -490.480231       | -490.509758       | -490.445726       | -490.448055       |
| ΔE <sub>CASPT2</sub> , eV   | 0.000             | 2.932             | 3.769             | 2.966             | 4.708             | 4.645             |
| Ref. Weight                 | 0.704             | 0.673             | 0.689             | 0.439             | 0.665             | 0.565             |
| <b>level shift = 0.10 h</b> |                   |                   |                   |                   |                   |                   |
| E <sub>CASPT2</sub> , H     | -490.617517       | -490.509080       | -490.478751       | -490.480038       | -490.443147       | -490.442568       |
| ΔE <sub>CASPT2</sub> , eV   | 0.000             | 2.951             | 3.776             | 3.741             | 4.745             | 4.761             |
| Ref. Weight                 | 0.712             | 0.685             | 0.702             | 0.684             | 0.683             | 0.642             |
| <b>level shift = 0.15 h</b> |                   |                   |                   |                   |                   |                   |
| E <sub>CASPT2</sub> , H     | -490.615598       | -490.506314       | -490.476100       | -490.473761       | -490.439299       | -490.439840       |
| ΔE <sub>CASPT2</sub> , eV   | 0.000             | 2.974             | 3.796             | 3.860             | 4.797             | 4.783             |
| Ref. Weight                 | 0.720             | 0.696             | 0.713             | 0.710             | 0.698             | 0.665             |
| <b>level shift = 0.20 h</b> |                   |                   |                   |                   |                   |                   |
| E <sub>CASPT2</sub> , H     | -490.613088       | -490.502874       | -490.473139       | -490.470035       | -490.435617       | -490.430968       |
| ΔE <sub>CASPT2</sub> , eV   | 0.000             | 2.999             | 3.808             | 3.893             | 4.829             | 4.956             |
| Ref. Weight                 | 0.728             | 0.706             | 0.721             | 0.721             | 0.709             | 0.694             |
| <b>level shift = 0.25 h</b> |                   |                   |                   |                   |                   |                   |
| E <sub>CASPT2</sub> , H     | -490.610066       | -490.498882       | -490.469707       | -490.466308       | -490.431529       | -490.422442       |
| ΔE <sub>CASPT2</sub> , eV   | 0.000             | 3.025             | 3.819             | 3.912             | 4.858             | 5.106             |
| Ref. Weight                 | 0.735             | 0.715             | 0.729             | 0.730             | 0.718             | 0.713             |

<sup>a</sup>The results with level shift 0.20 h are listed in Table 2 of the manuscript.

**Table S5. Vertical excitation energies of *cis-p*-aminophenylnitrosooxide calculated using CASPT2 method at the RB3LYP/6-31G(d) geometry.<sup>a</sup>**

| state              | $\Delta E_{\text{CASSCF}}$ ,<br>eV | $\Delta E_{\text{CASPT2}}$ ,<br>eV | ref.<br>weight | $\lambda$ ,<br>nm | f                    | Major<br>configurations                                                                       |
|--------------------|------------------------------------|------------------------------------|----------------|-------------------|----------------------|-----------------------------------------------------------------------------------------------|
| 1A'                | 0.0                                | 0.0                                | 0.70           |                   |                      | 65% of ground state<br>configuration                                                          |
| 1 <sup>1</sup> A'' | 1.41                               | 2.58                               | 0.72           | 481               | $2.0 \times 10^{-5}$ | 82%: 30a' → 7a''                                                                              |
| 2 <sup>1</sup> A'  | 4.34                               | 2.58                               | 0.68           | 480               | $3.4 \times 10^{-1}$ | 13% of ground state<br>configuration<br>45%: 6a'' → 7a''<br>12%: 6a'' → 7a''<br>+ 4a'' → 7a'' |
| 3 <sup>1</sup> A'  | 3.62                               | 3.56                               | 0.70           | 349               | $2.0 \times 10^{-2}$ | 15%: 6a'' → 8a''<br>13%: 2 (6a'') → 2 (7a'')<br>10%: 4a'' → 7a''                              |
| 4 <sup>1</sup> A'  | 3.66                               | 3.63                               | 0.70           | 341               | $1.1 \times 10^{-2}$ | 15%: 6a'' → 8a''<br>12%: 5a'' → 7a''<br>10%: 6a'' → 7a''<br>+ 5a'' → 7a''                     |
| 5 <sup>1</sup> A'  | 5.54                               | 4.62                               | 0.68           | 269               | $1.5 \times 10^{-2}$ | 14%: 6a'' → 8a''<br>14%: 6a'' → 7a''<br>+ 5a'' → 8a''<br>13%: 5a'' → 7a''                     |
| 6 <sup>1</sup> A'  | 5.89                               | 5.03                               | 0.69           | 246               | $4.2 \times 10^{-2}$ | 13%: 6a'' → 8a''<br>12%: 6a'' → 7a''<br>+ 5a'' → 8a''<br>11%: 5a'' → 7a''                     |
| 2 <sup>1</sup> A'' | 4.32                               | 5.12                               | 0.71           | 242               | $1.4 \times 10^{-5}$ | 47%: 30a' → 7a''<br>+ 6a'' → 7a''<br>34%: 30a' → 9a''                                         |

<sup>a</sup> based on a CASSCF(16,14)/ANO-S wavefunction at the B3LYP/6-31G(d) geometry; A' and A'' states were calculated with a level shift of 0.15 h.

**Table S6. Dependence of energy and reference weight of CASPT2 states on the level shift for *cis-p*-aminophenylnitroso oxide<sup>a</sup> (geometry B3LYP/6-31G(d))**

| CASPT2 states               | 1 <sup>1</sup> A' | 2 <sup>1</sup> A' | 3 <sup>1</sup> A' | 4 <sup>1</sup> A' | 5 <sup>1</sup> A' | 6 <sup>1</sup> A' |
|-----------------------------|-------------------|-------------------|-------------------|-------------------|-------------------|-------------------|
| <b>level shift = 0.00 h</b> |                   |                   |                   |                   |                   |                   |
| E <sub>CASPT2</sub> , H     | -490.632642       | -490.540052       | -490.501941       | -490.498361       | -490.468144       | -490.448990       |
| ΔE <sub>CASPT2</sub> , eV   | 0.000             | 2.520             | 3.557             | 3.654             | 4.476             | 4.997             |
| Ref. weight                 | 0.677             | 0.637             | 0.633             | 0.650             | 0.560             | 0.597             |
| <b>level shift = 0.05 h</b> |                   |                   |                   |                   |                   |                   |
| E <sub>CASPT2</sub> , H     | -490.632136       | -490.539147       | -490.512715       | -490.512495       | -490.468479       | -490.448921       |
| ΔE <sub>CASPT2</sub> , eV   | 0.000             | 2.530             | 3.250             | 3.256             | 4.453             | 4.985             |
| Ref. weight                 | 0.687             | 0.653             | 0.606             | 0.590             | 0.625             | 0.651             |
| <b>level shift = 0.10 h</b> |                   |                   |                   |                   |                   |                   |
| E <sub>CASPT2</sub> , H     | -490.630727       | -490.536894       | -490.501473       | -490.498434       | -490.462349       | -490.451518       |
| ΔE <sub>CASPT2</sub> , eV   | 0.000             | 2.553             | 3.517             | 3.600             | 4.582             | 4.877             |
| Ref. Weight                 | 0.696             | 0.666             | 0.681             | 0.685             | 0.672             | 0.654             |
| <b>level shift = 0.15 h</b> |                   |                   |                   |                   |                   |                   |
| E <sub>CASPT2</sub> , H     | -490.628551       | -490.533671       | -490.497912       | -490.495120       | -490.458942       | -490.443611       |
| ΔE <sub>CASPT2</sub> , eV   | 0.000             | 2.582             | 3.555             | 3.631             | 4.615             | 5.033             |
| Ref. Weight                 | 0.704             | 0.678             | 0.695             | 0.698             | 0.684             | 0.685             |
| <b>level shift = 0.20 h</b> |                   |                   |                   |                   |                   |                   |
| E <sub>CASPT2</sub> , H     | -490.625720       | -490.529694       | -490.494218       | -490.491671       | -490.455005       | -490.439456       |
| ΔE <sub>CASPT2</sub> , eV   | 0.000             | 2.613             | 3.578             | 3.648             | 4.645             | 5.069             |
| Ref. Weight                 | 0.713             | 0.688             | 0.705             | 0.707             | 0.695             | 0.696             |
| <b>level shift = 0.25 h</b> |                   |                   |                   |                   |                   |                   |
| E <sub>CASPT2</sub> , H     | -490.622325       | -490.525110       | -490.490132       | -490.487805       | -490.450570       | -490.435038       |
| ΔE <sub>CASPT2</sub> , eV   | 0.000             | 2.645             | 3.597             | 3.661             | 4.674             | 5.096             |
| Ref. weight                 | 0.720             | 0.698             | 0.714             | 0.716             | 0.705             | 0.706             |

<sup>a</sup>The results with level shift 0.15 h are listed in Table S5.

**Table S7.** Dependence of energy and reference weight of CASPT2 states on the level shift for *trans-p*-aminophenylnitroso oxide<sup>a</sup> (geometry CASSCF(12,12)/6-31G(d))

| CASPT2 states                         | 1 <sup>1</sup> A' | 2 <sup>1</sup> A' | 3 <sup>1</sup> A' | 4 <sup>1</sup> A' | 5 <sup>1</sup> A' | 6 <sup>1</sup> A' |
|---------------------------------------|-------------------|-------------------|-------------------|-------------------|-------------------|-------------------|
| <b>level shift = 0.00 h</b>           |                   |                   |                   |                   |                   |                   |
| $E_{\text{CASPT2}}, \text{H}$         | -490.624626       | -490.524977       | -490.498810       | -490.489627       | -490.439511       | -490.438708       |
| $\Delta E_{\text{CASPT2}}, \text{eV}$ | 0.000             | 2.712             | 3.424             | 3.674             | 5.037             | 5.059             |
| Ref. weight                           | 0.685             | 0.648             | 0.644             | 0.656             | 0.153             | 0.526             |
| <b>level shift = 0.05 h</b>           |                   |                   |                   |                   |                   |                   |
| $E_{\text{CASPT2}}, \text{H}$         | -490.624139       | -490.524175       | -490.497694       | -490.563936       | -490.442497       | -490.445863       |
| $\Delta E_{\text{CASPT2}}, \text{eV}$ | 0.000             | 2.720             | 3.441             | 1.638             | 4.943             | 4.851             |
| Ref. weight                           | 0.694             | 0.662             | 0.677             | 0.365             | 0.626             | 0.624             |
| <b>level shift = 0.10 h</b>           |                   |                   |                   |                   |                   |                   |
| $E_{\text{CASPT2}}, \text{H}$         | -490.622781       | -490.522098       | -490.495694       | -490.492007       | -490.471108       | -490.447413       |
| $\Delta E_{\text{CASPT2}}, \text{eV}$ | 0.000             | 2.740             | 3.458             | 3.559             | 4.127             | 4.772             |
| Ref. weight                           | 0.703             | 0.675             | 0.690             | 0.687             | 0.560             | 0.640             |
| <b>level shift = 0.15 h</b>           |                   |                   |                   |                   |                   |                   |
| $E_{\text{CASPT2}}, \text{H}$         | -490.620685       | -490.519071       | -490.492988       | -490.487884       | -490.437407       | -490.433960       |
| $\Delta E_{\text{CASPT2}}, \text{eV}$ | 0.000             | 2.765             | 3.475             | 3.614             | 4.987             | 5.081             |
| Ref. weight                           | 0.711             | 0.686             | 0.700             | 0.703             | 0.682             | 0.695             |
| <b>level shift = 0.20 h</b>           |                   |                   |                   |                   |                   |                   |
| $E_{\text{CASPT2}}, \text{H}$         | -490.617958       | -490.515303       | -490.489664       | -490.484311       | -490.431658       | -490.430006       |
| $\Delta E_{\text{CASPT2}}, \text{eV}$ | 0.000             | 2.793             | 3.491             | 3.637             | 5.070             | 5.114             |
| Ref. weight                           | 0.719             | 0.696             | 0.710             | 0.713             | 0.700             | 0.706             |
| <b>level shift = 0.25 h</b>           |                   |                   |                   |                   |                   |                   |
| $E_{\text{CASPT2}}, \text{H}$         | -490.614689       | -490.510940       | -490.485819       | -490.480481       | -490.426337       | -490.425778       |
| $\Delta E_{\text{CASPT2}}, \text{eV}$ | 0.000             | 2.823             | 3.507             | 3.652             | 5.125             | 5.141             |
| Ref. weight                           | 0.727             | 0.706             | 0.719             | 0.722             | 0.712             | 0.715             |

<sup>a</sup>The results with level shift 0.15 h are listed in Table 3 of the manuscript.

**Table S8. Vertical excitation energies of *trans-p*-aminophenylnitroso oxide calculated using CASPT2 method at the RB3LYP/6-31G(d) geometry.<sup>a</sup>**

| state             | $\Delta E_{\text{CASSCF}}$ ,<br>eV | $\Delta E_{\text{CASPT2}}$ ,<br>eV | ref.<br>weight | $\lambda$<br>nm | f                    | Major configurations                                                                 |
|-------------------|------------------------------------|------------------------------------|----------------|-----------------|----------------------|--------------------------------------------------------------------------------------|
| 1A'               | 0.0                                | 0.0                                | 0.71           |                 |                      | 61% of ground state<br>configuration<br>10%: 6a" →7a"                                |
| 1 <sup>1</sup> A" | 1.89                               | 2.40                               | 0.69           | 516             | 1.2×10 <sup>-5</sup> | 83%: 30a' →7a"                                                                       |
| 2 <sup>1</sup> A' | 4.33                               | 2.87                               | 0.69           | 432             | 4.7×10 <sup>-1</sup> | 17% of ground state<br>configuration<br>49%: 6a" →7a"                                |
| 3 <sup>1</sup> A' | 3.49                               | 3.31                               | 0.70           | 375             | 1.7×10 <sup>-2</sup> | 22%: 2(6a") →2(7a")<br>18%: 4a" →7a"<br>17%: 6a" →9a"<br>13%: 6a" →7a"<br>+ 4a" →7a" |
| 4 <sup>1</sup> A' | 3.60                               | 3.37                               | 0.70           | 368             | 2.2×10 <sup>-2</sup> | 29%: 6a" →8a"<br>16%: 5a" →7a"<br>15%: 6a" →7a"<br>+ 5a" →7a"                        |
| 5 <sup>1</sup> A' | 5.80                               | 4.34                               | 0.69           | 285             | 8.2×10 <sup>-2</sup> | 21%: 5a" →7a"<br>19%: 6a" →8a"                                                       |
| 6 <sup>1</sup> A' | 5.49                               | 4.90                               | 0.69           | 253             | 8.2×10 <sup>-3</sup> | 24%: 6a" →7a"<br>+ 5a" →8a"                                                          |

<sup>a</sup> based on a CASSCF(16,14)/ANO-S wavefunction at the B3LYP/6-31G(d) geometry; A' states were calculated with a level shift of 0.15 h, A" states were calculated with no level shift.



**Table S9.** Dependence of energy and reference weight of CASPT2 states on the level shift for *trans-p*-aminophenylnitroso oxide<sup>a</sup> (geometry RB3LYP/6-31G(d))

| CASPT2 states               | 1 <sup>1</sup> A' | 2 <sup>1</sup> A' | 3 <sup>1</sup> A' | 4 <sup>1</sup> A' | 5 <sup>1</sup> A' | 6 <sup>1</sup> A' |
|-----------------------------|-------------------|-------------------|-------------------|-------------------|-------------------|-------------------|
| <b>level shift = 0.00 h</b> |                   |                   |                   |                   |                   |                   |
| E <sub>CASPT2</sub> , H     | -490.630543       | -490.526582       | -490.505492       | -490.507948       | -490.473056       | -490.464089       |
| ΔE <sub>CASPT2</sub> , eV   | 0.000             | 2.829             | 3.403             | 3.336             | 4.285             | 4.529             |
| Ref. weight                 | 0.684             | 0.653             | 0.620             | 0.662             | 0.641             | 0.078             |
| <b>level shift = 0.05 h</b> |                   |                   |                   |                   |                   |                   |
| E <sub>CASPT2</sub> , H     | -490.630056       | -490.525837       | -490.515487       | -497.406897       | -492.374681       | -490.453606       |
| ΔE <sub>CASPT2</sub> , eV   | 0.000             | 2.836             | 3.118             |                   |                   | 4.801             |
| Ref. weight                 | 0.694             | 0.667             | 0.641             | 0.007             | 0.025             | 0.650             |
| <b>level shift = 0.10 h</b> |                   |                   |                   |                   |                   |                   |
| E <sub>CASPT2</sub> , H     | -490.628700       | -490.523893       | -490.580320       | -490.505418       | -490.470132       | -490.469713       |
| ΔE <sub>CASPT2</sub> , eV   | 0.000             | 2.852             | 3.276             | 3.355             | 4.315             | 4.326             |
| Ref. weight                 | 0.703             | 0.678             | 0.690             | 0.692             | 0.676             | 0.604             |
| <b>level shift = 0.15 h</b> |                   |                   |                   |                   |                   |                   |
| E <sub>CASPT2</sub> , H     | -490.626605       | -490.521033       | -490.505028       | -490.502761       | -490.466952       | -490.446501       |
| ΔE <sub>CASPT2</sub> , eV   | 0.000             | 2.873             | 3.308             | 3.370             | 4.344             | 4.901             |
| Ref. weight                 | 0.711             | 0.689             | 0.703             | 0.702689          | 0.688             | 0.693             |
| <b>level shift = 0.20 h</b> |                   |                   |                   |                   |                   |                   |
| E <sub>CASPT2</sub> , H     | -490.623879       | -490.517445       | -490.501635       | -490.499522       | -490.463207       | -490.442268       |
| ΔE <sub>CASPT2</sub> , eV   | 0.000             | 2.896             | 3.326             | 3.384             | 4.372             | 4.942             |
| Ref. weight                 | 0.719             | 0.699             | 0.713             | 0.711             | 0.698             | 0.705             |
| <b>level shift = 0.25 h</b> |                   |                   |                   |                   |                   |                   |
| E <sub>CASPT2</sub> , H     | -490.620610       | -490.513265       | -490.497869       | -490.495764       | -490.458929       | -490.437975       |
| ΔE <sub>CASPT2</sub> , eV   | 0.000             | 2.921             | 3.340             | 3.397             | 4.400             | 4.970             |
| Ref. weight                 | 0.727             | 0.708             | 0.721             | 0.720             | 0.707             | 0.715             |

<sup>a</sup>The results with level shift 0.15 h are listed in Table S8.

**Table S10. Summary of CBS-QB3 calculations**

|                                                 | H(0 K),<br>kcal/mol | H(298 K),<br>kcal/mol | G(298 K),<br>kcal/mol | $\Delta H(0\text{ K})$ ,<br>kcal/mol | $\Delta H(298\text{ K})$ ,<br>kcal/mol | $\Delta G(298\text{ K})$ ,<br>kcal/mol |
|-------------------------------------------------|---------------------|-----------------------|-----------------------|--------------------------------------|----------------------------------------|----------------------------------------|
| $^3\text{NH}_2\text{PhN} + \text{O}_2$          | -491.230477         | -491.219401           | -491.281987           | 0.0                                  | 0.0                                    | 0.0                                    |
| <i>cis</i> -NH <sub>2</sub> PhNOO,<br>singlet   | -491.262193         | -491.252574           | -491.295769           | -19.9                                | -20.8                                  | -8.6                                   |
| <i>syn</i> -NH <sub>2</sub> PhNOO,<br>triplet   | -491.235343         | -491.225302           | -491.270560           | -3.1                                 | -3.7                                   | +7.2                                   |
| <i>trans</i> -NH <sub>2</sub> PhNOO,<br>singlet | -491.260009         | -491.250282           | -491.293680           | -18.5                                | -19.4                                  | -7.3                                   |
| <i>anti</i> -NH <sub>2</sub> PhNOO,<br>triplet  | -491.235184         | -491.225032           | -491.270886           | -3.0                                 | -3.5                                   | +7.0                                   |
| NH <sub>2</sub> PhNOO<br>dioxaziridine          | -491.244113         | -491.234578           | -491.277756           | -8.6                                 | -9.5                                   | +2.7                                   |
| NH <sub>2</sub> PhNO <sub>2</sub>               | -491.364963         | -491.355637           | -491.398421           | -84.4                                | -85.5                                  | -73.1                                  |
| $^3\text{PhN} + \text{O}_2$                     | -435.947759         | -435.938169           | -435.996933           | 0.0                                  | 0.0                                    | 0.0                                    |
| <i>cis</i> -PhNOO, singlet                      | -435.977727         | -435.969765           | -436.009602           | -18.8                                | -19.8                                  | -7.9                                   |
| <i>syn</i> -PhNOO, triplet                      | -435.949080         | -435.940554           | -435.982765           | -0.8                                 | -1.5                                   | +8.9                                   |
| <i>trans</i> -PhNOO, singlet                    | -435.977817         | -435.969658           | -436.009890           | -18.9                                | -19.8                                  | -8.1                                   |
| <i>anti</i> -PhNOO, triplet                     | -435.949819         | -435.941218           | -435.983845           | -1.3                                 | -1.9                                   | +8.2                                   |
| PhNOO dioxaziridine                             | -435.963739         | -435.955735           | -435.995808           | -10.0                                | -11.0                                  | +0.7                                   |
| PhNO <sub>2</sub>                               | -436.083418         | -436.075597           | -436.115455           | -85.1                                | -86.2                                  | -74.4                                  |

**Table S11. Summary of G2M(CC5, MP2) calculations**

|                                              | H(0 K), kcal/mol | $\Delta H(0 K)$ , kcal/mol |
|----------------------------------------------|------------------|----------------------------|
| $^3\text{NH}_2\text{PhN} + \text{O}_2$       | -491.188632      | 0.0                        |
| <i>cis</i> -NH <sub>2</sub> PhNOO, singlet   | -491.234750      | -28.9                      |
| <i>syn</i> -NH <sub>2</sub> PhNOO, triplet   | -491.195054      | -4.0                       |
| <i>trans</i> -NH <sub>2</sub> PhNOO, singlet | -491.231816      | -27.1                      |
| <i>anti</i> -NH <sub>2</sub> PhNOO, triplet  | -491.195029      | -4.0                       |
| NH <sub>2</sub> PhNOO dioxaziridine          | -491.214032      | -15.9                      |
| NH <sub>2</sub> PhNO <sub>2</sub>            | -491.334128      | -91.3                      |
| $^3\text{PhN} + \text{O}_2$                  | -435.909331      | 0.0                        |
| <i>cis</i> -PhNOO, singlet                   | -435.953061      | -27.4                      |
| <i>syn</i> -PhNOO, triplet                   | -435.912864      | -2.2                       |
| <i>trans</i> -PhNOO, singlet                 | -435.952217      | -26.9                      |
| <i>anti</i> -PhNOO, triplet                  | -435.912008      | -1.7                       |
| PhNOO dioxaziridine                          | -435.936772      | -17.2                      |
| PhNO <sub>2</sub>                            | -436.055984      | -92.0                      |

**Table S12. Summary of B3LYP/6-311G(d,p) calculations**

|                                                 | H(0 K),<br>kcal/mol | H(298 K),<br>kcal/mol | G(298 K),<br>kcal/mol | $\Delta H(0 K)$ ,<br>kcal/mol | $\Delta H(298 K)$ ,<br>kcal/mol | $\Delta G(298 K)$ ,<br>kcal/mol |
|-------------------------------------------------|---------------------|-----------------------|-----------------------|-------------------------------|---------------------------------|---------------------------------|
| $^3\text{NH}_2\text{PhN} + \text{O}_2$          | -492.008411         | -491.997397           | -492.059881           | 0.0                           | 0.0                             | 0.0                             |
| <i>cis</i> -NH <sub>2</sub> PhNOO,<br>singlet   | -492.023609         | -492.014069           | -492.057111           | -9.5                          | -10.5                           | +1.7                            |
| <i>syn</i> -NH <sub>2</sub> PhNOO,<br>triplet   | -492.005848         | -491.995879           | -492.041002           | +1.6                          | +1.0                            | +11.8                           |
| <i>trans</i> -NH <sub>2</sub> PhNOO,<br>singlet | -492.017436         | -492.007781           | -492.051045           | -5.7                          | -6.5                            | +5.5                            |
| <i>anti</i> -NH <sub>2</sub> PhNOO,<br>triplet  | -492.006226         | -491.996145           | -492.041863           | +1.4                          | +0.8                            | +11.3                           |
| NH <sub>2</sub> PhNOO<br>dioxaziridine          | -491.994358         | -491.984895           | -492.027944           | +8.8                          | +7.8                            | +20.0                           |
| NH <sub>2</sub> PhNO <sub>2</sub>               | -492.123543         | -492.114287           | -492.156945           | -72.2                         | -73.3                           | -60.9                           |
| $^3\text{PhN} + \text{O}_2$                     | -436.647277         | -436.637732           | -436.696426           | 0.0                           | 0.0                             | 0.0                             |
| <i>cis</i> -PhNOO, singlet                      | -436.657222         | -436.649317           | -436.689056           | -6.2                          | -7.3                            | +4.6                            |
| <i>syn</i> -PhNOO, triplet                      | -436.641064         | -436.632596           | -436.674701           | +3.9                          | +3.2                            | +13.6                           |
| <i>trans</i> -PhNOO, singlet                    | -436.654088         | -436.645979           | -436.686133           | -4.3                          | -5.2                            | +6.5                            |
| <i>anti</i> -PhNOO, triplet                     | -436.641794         | -436.633246           | -436.675799           | +3.4                          | +2.8                            | +12.9                           |
| PhNOO dioxaziridine                             | -436.634596         | -436.626649           | -436.666622           | +8.0                          | +7.0                            | +18.7                           |
| PhNO <sub>2</sub>                               | -436.761942         | -436.754176           | -436.793939           | -72.0                         | -73.1                           | -61.2                           |

**Table S13. Vertical excitation energies of *p*-aminophenyl dioxaziridine calculated using CASPT2 method.<sup>a</sup>**

| state             | $\Delta E_{\text{CASSCF}}$ ,<br>eV | $\Delta E_{\text{CASPT2}}$ ,<br>eV | ref.<br>weight | $\lambda$ ,<br>nm | f                    | Major<br>configurations                             |
|-------------------|------------------------------------|------------------------------------|----------------|-------------------|----------------------|-----------------------------------------------------|
| 1 <sup>1</sup> A' | 0.0                                | 0.0                                | 0.74           |                   |                      | 82% of ground state<br>configuration                |
| 2 <sup>1</sup> A' | 6.17                               | 3.94                               | 0.71           | 315               | $5.8 \times 10^{-2}$ | 29%: 8a" → 9a"<br>32%: 5a" → 9a"<br>12%: 5a" → 12a" |
| 3 <sup>1</sup> A' | 4.72                               | 4.21                               | 0.72           | 294               | $3.9 \times 10^{-3}$ | 41%: 8a" → 10a"<br>18%: 7a" → 9a"                   |
| 4 <sup>1</sup> A' | 6.74                               | 4.70                               | 0.71           | 264               | $1.6 \times 10^{-1}$ | 38%: 8a" → 9a"<br>18%: 5a" → 9a"                    |
| 1 <sup>1</sup> A" | 8.55                               | 5.11                               | 0.70           | 243               | $1.2 \times 10^{-2}$ | 84%: 28a' → 9a"                                     |
| 2 <sup>1</sup> A" | 7.20                               | 5.56                               | 0.72           | 223               | $9.0 \times 10^{-3}$ | 80%: 8a" → 29a'                                     |

<sup>a</sup> based on a CASSCF(12,12)/ANO-S wavefunction at the B3LYP/6-31G(d) geometry; all states were calculated with a level shift of 0.25 h.

**Table S14.** Dependence of energy and reference weight of CASPT2 states on the level shift for *p*-aminophenyl dioxaziridine<sup>a</sup>

| CASPT2 states               | 1 <sup>1</sup> A' | 2 <sup>1</sup> A' | 3 <sup>1</sup> A' | 4 <sup>1</sup> A' | 1 <sup>1</sup> A'' | 2 <sup>1</sup> A'' |
|-----------------------------|-------------------|-------------------|-------------------|-------------------|--------------------|--------------------|
| <b>level shift = 0.00 h</b> |                   |                   |                   |                   |                    |                    |
| E <sub>CASPT2</sub> , H     | -490.537678       | -490.405533       | -490.381358       | -490.290141       | -490.354769        | -490.334763        |
| ΔE <sub>CASPT2</sub> , eV   | 0.000             | 3.596             | 4.254             | 6.736             | 4.977              | 5.522              |
| Ref. weight                 | 0.697             | 0.031             | 0.498             | 0.081             | 0.640              | 0.674              |
| <b>level shift = 0.05 h</b> |                   |                   |                   |                   |                    |                    |
| E <sub>CASPT2</sub> , H     | -490.537253       | -490.400771       | -490.402785       | -490.396054       | -490.353806        | -490.334449        |
| ΔE <sub>CASPT2</sub> , eV   | 0.000             | 3.727             | 3.659             | 3.842             | 4.992              | 5.519              |
| Ref. weight                 | 0.706             | 0.640             | 0.581             | 0.537             | 0.659              | 0.684              |
| <b>level shift = 0.10 h</b> |                   |                   |                   |                   |                    |                    |
| E <sub>CASPT2</sub> , H     | -490.536054       | -490.395558       | -490.387242       | -490.378363       | -490.351769        | -490.333671        |
| ΔE <sub>CASPT2</sub> , eV   | 0.000             | 3.823             | 4.049             | 4.291             | 5.015              | 5.507              |
| Ref. weight                 | 0.714             | 0.674             | 0.674             | 0.638             | 0.671              | 0.692              |
| <b>level shift = 0.15 h</b> |                   |                   |                   |                   |                    |                    |
| E <sub>CASPT2</sub> , H     | -490.534183       | -490.392068       | -490.382141       | -490.367590       | -490.348895        | -490.330725        |
| ΔE <sub>CASPT2</sub> , eV   | 0.000             | 3.867             | 4.137             | 4.533             | 5.042              | 5.536              |
| Ref. weight                 | 0.722             | 0.687             | 0.703             | 0.677             | 0.682              | 0.704              |
| <b>level shift = 0.20 h</b> |                   |                   |                   |                   |                    |                    |
| E <sub>CASPT2</sub> , H     | -490.531725       | -490.388236       | -490.378142       | -490.361560       | -490.345302        | -490.327783        |
| ΔE <sub>CASPT2</sub> , eV   | 0.000             | 3.905             | 4.179             | 4.630             | 5.073              | 5.550              |
| Ref. weight                 | 0.729             | 0.697             | 0.714             | 0.694             | 0.692              | 0.712              |
| <b>level shift = 0.25 h</b> |                   |                   |                   |                   |                    |                    |
| E <sub>CASPT2</sub> , H     | -490.528757       | -490.383927       | -490.374031       | -490.356055       | -490.341094        | -490.324314        |
| ΔE <sub>CASPT2</sub> , eV   | 0.000             | 3.941             | 4.210             | 4.699             | 5.107              | 5.563              |
| Ref. weight                 | 0.736             | 0.707             | 0.724             | 0.706             | 0.701              | 0.720              |
| <b>level shift = 0.30 h</b> |                   |                   |                   |                   |                    |                    |
| E <sub>CASPT2</sub> , H     | -490.525342       | -490.379169       | -490.369663       | -490.350569       | -490.336365        | -490.320368        |
| ΔE <sub>CASPT2</sub> , eV   | 0.000             | 3.978             | 4.236             | 4.756             | 5.142              | 5.578              |
| Ref. weight                 | 0.743             | 0.716             | 0.732             | 0.716             | 0.709              | 0.728              |

<sup>a</sup>The results with level shift 0.25 h are listed in Table S13.

# Matrix isolation and computational study of the photochemistry of *p*-azidoaniline

Elena A. Pritchina, Nina P. Gritsan, Thomas Bally

## SUPPORTING INFORMATION, PART 3 (FIGURES)

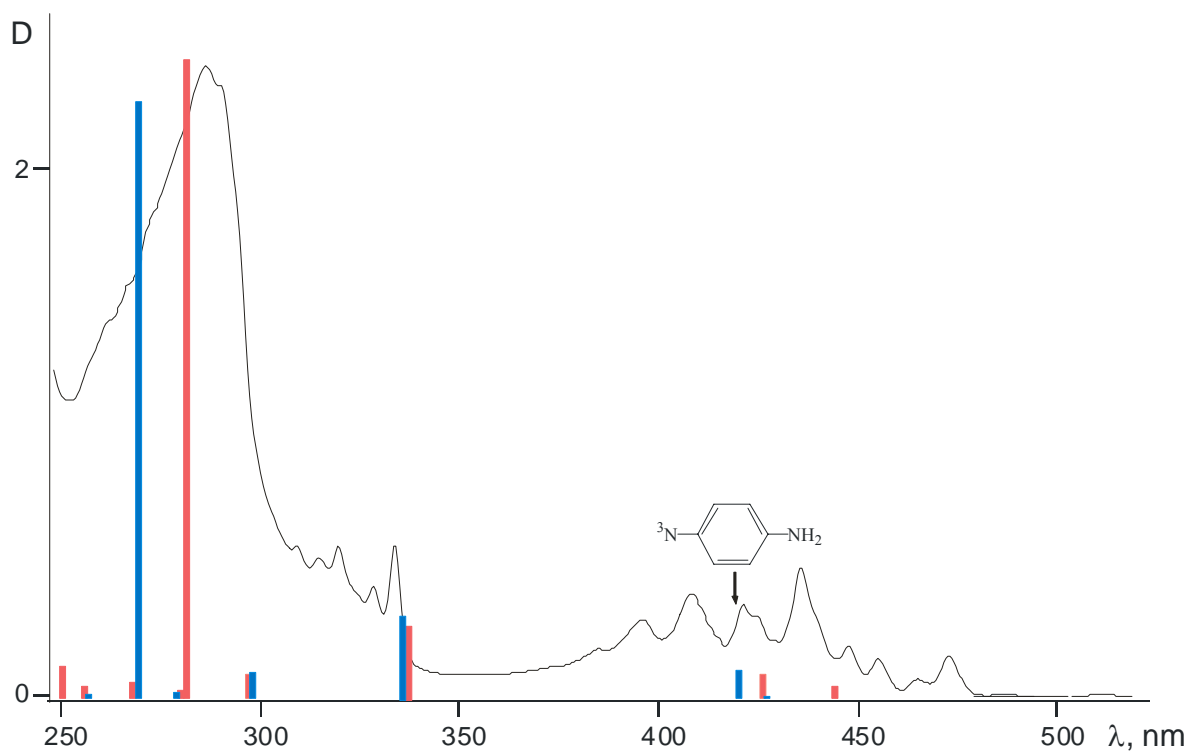

**Figure S1**

The electronic absorption spectrum of *p*-aminophenylnitrene (**4**) in an Ar matrix at 12 K and comparison of the positions and relative oscillator strengths of the electronic transitions of nitrene **4** calculated for planar (symmetry  $C_{2v}$  - **red bars**, cf. Table 1) and non-planar (symmetry  $C_s$  - **blue bars**, cf. Table S1) geometry of *p*-aminophenylnitrene.

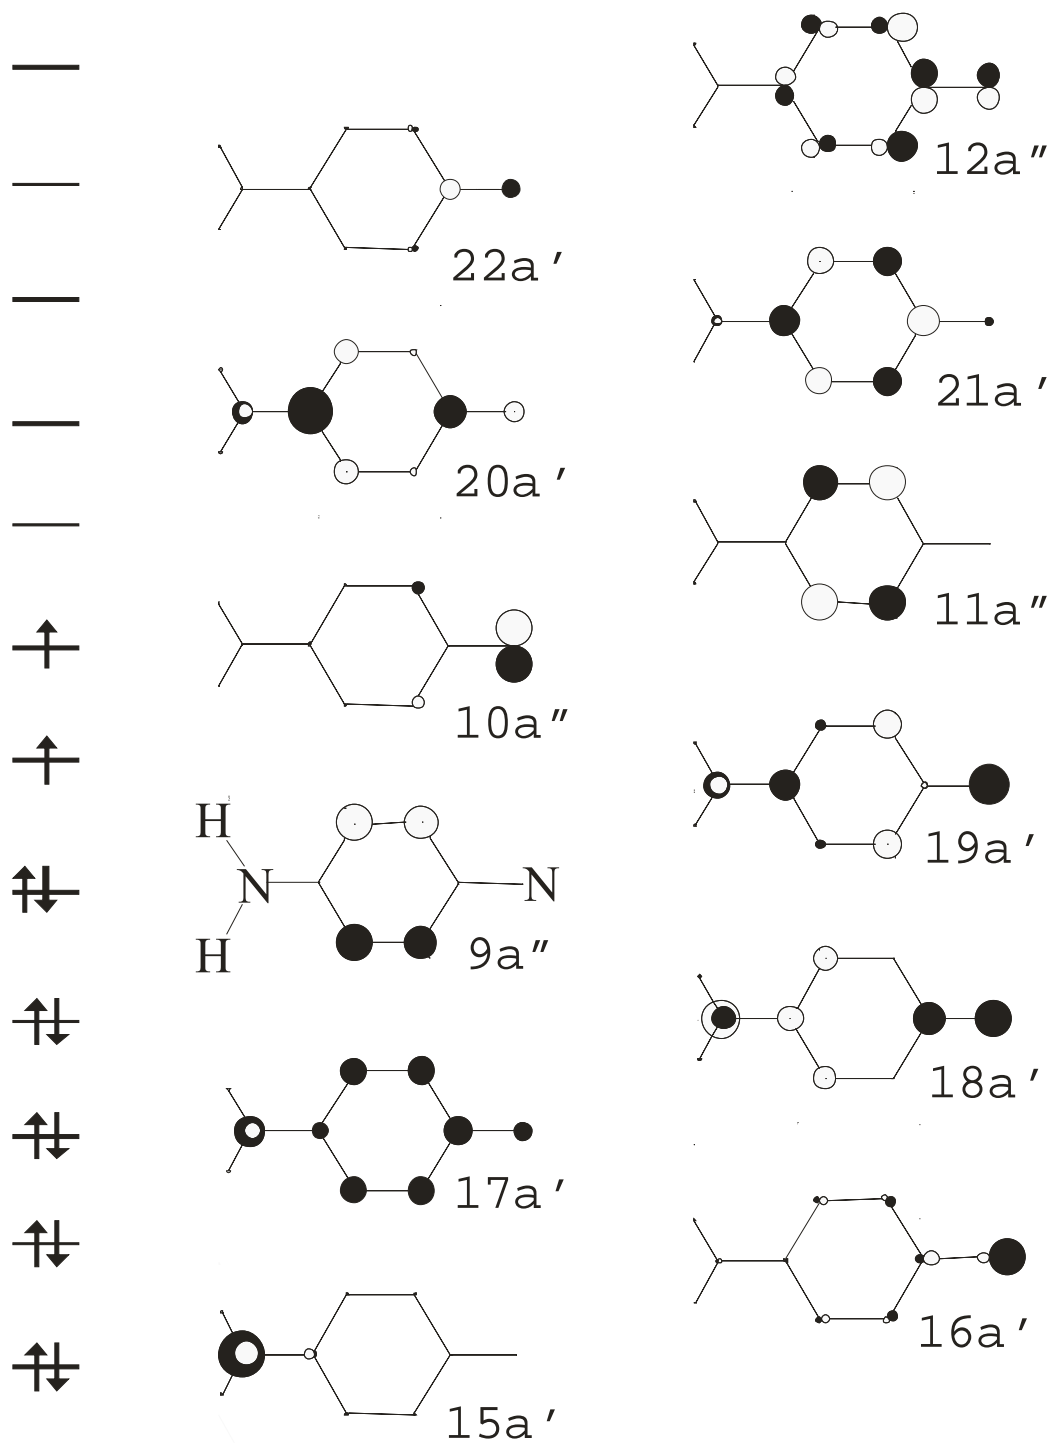

**Figure S2**

Active space used in the CASSCF/CASPT2 calculations of the electronic transitions of the triplet *p*-aminophenylnitrene (symmetry  $C_s$ , cf. Table S1).

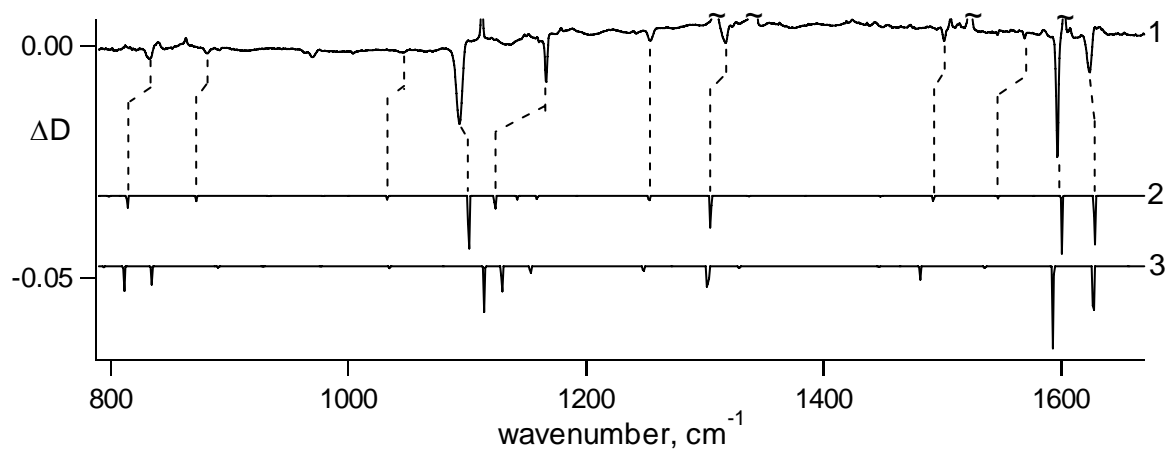

**Figure S3**

Difference IR spectra produced by bleaching of the adducts of nitrene **4** with oxygen in an Ar matrix at 12 K to >515 nm for 30 s (spectrum 1). The traces 2 and 3 show the IR spectra of *trans*-**(8)** *p*-aminophenylnitroso oxides calculated by RB3LYP and UB3LYP, respectively, and scaled by 0.9614.



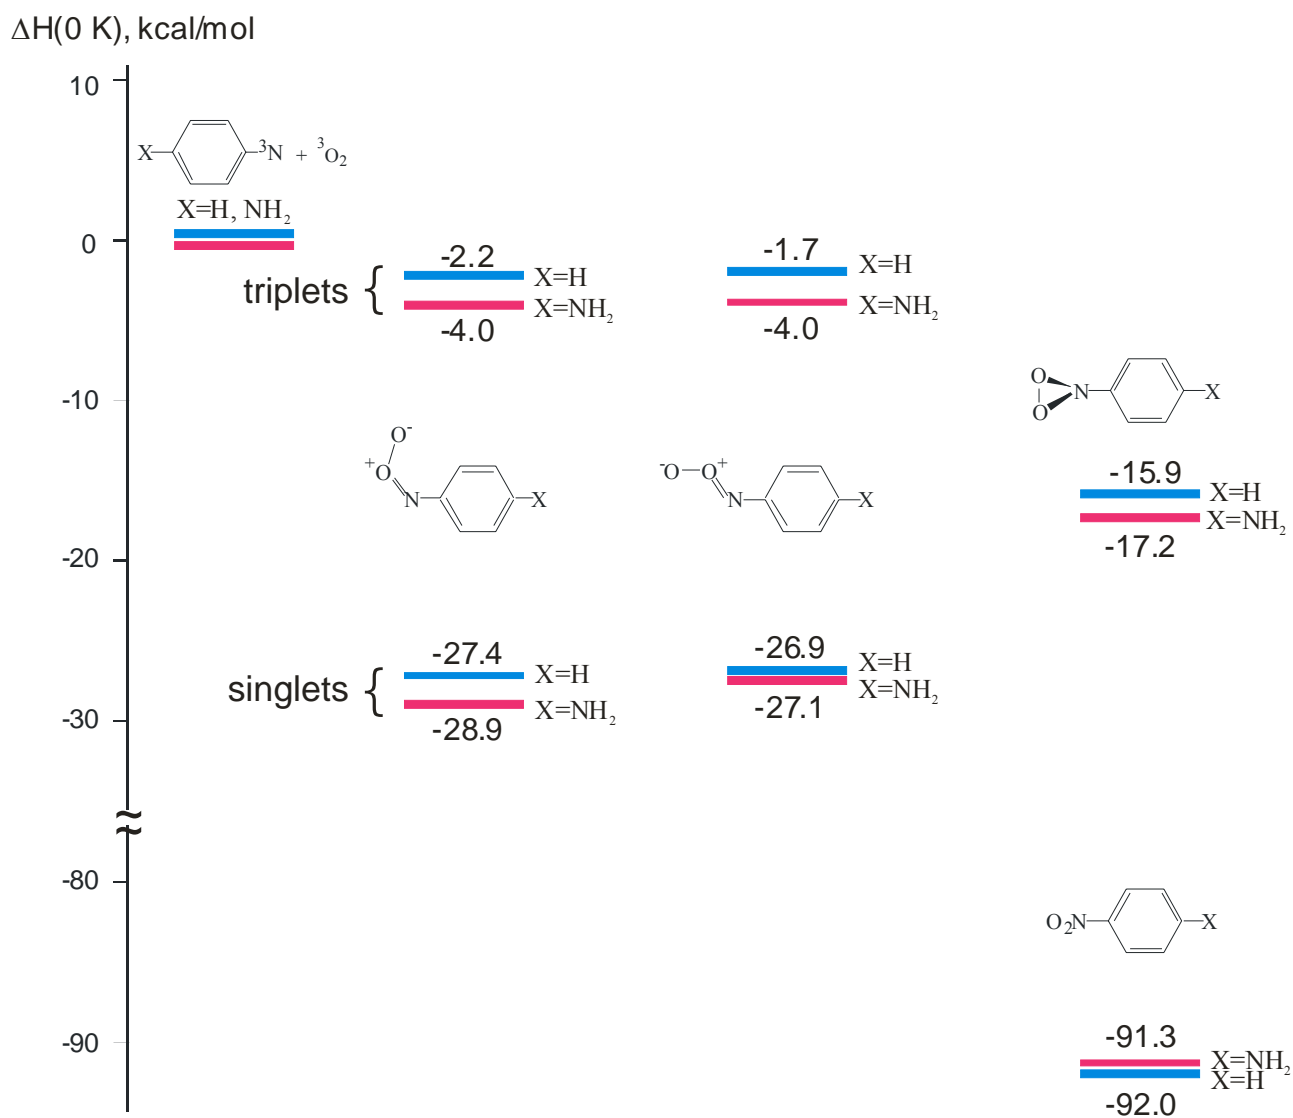

**Figure S4**

Relative 0 K enthalpies of the species involved in the formation and rearrangement of phenyl- and *p*-aminophenyl nitroso oxides calculated by the multi-level scheme G2M(CC5MP2).

Method G2M(CC5, MP2):<sup>a</sup>

$$E_{\text{G2M(CC5, MP2)}} = \text{CCSD(T)/6-311G(d,p)} + \Delta E(+3d2p) + \Delta E(\text{HLC,CC5}) + \text{ZPE}$$

$$\Delta E(+3d2p) = E[\text{PMP2/6-311+G(3df,2p)}] - E[\text{PMP2/6-311G(d,p)}]$$

$$\Delta E(\text{HLC,CC5}) = [-5,30n_{\beta} - 0,19n_{\alpha}]/1000$$

<sup>a</sup>A.M. Mebel, K. Morokuma, M.C. Lin. *J. Chem. Phys.*, 1995, **103**, 7414.

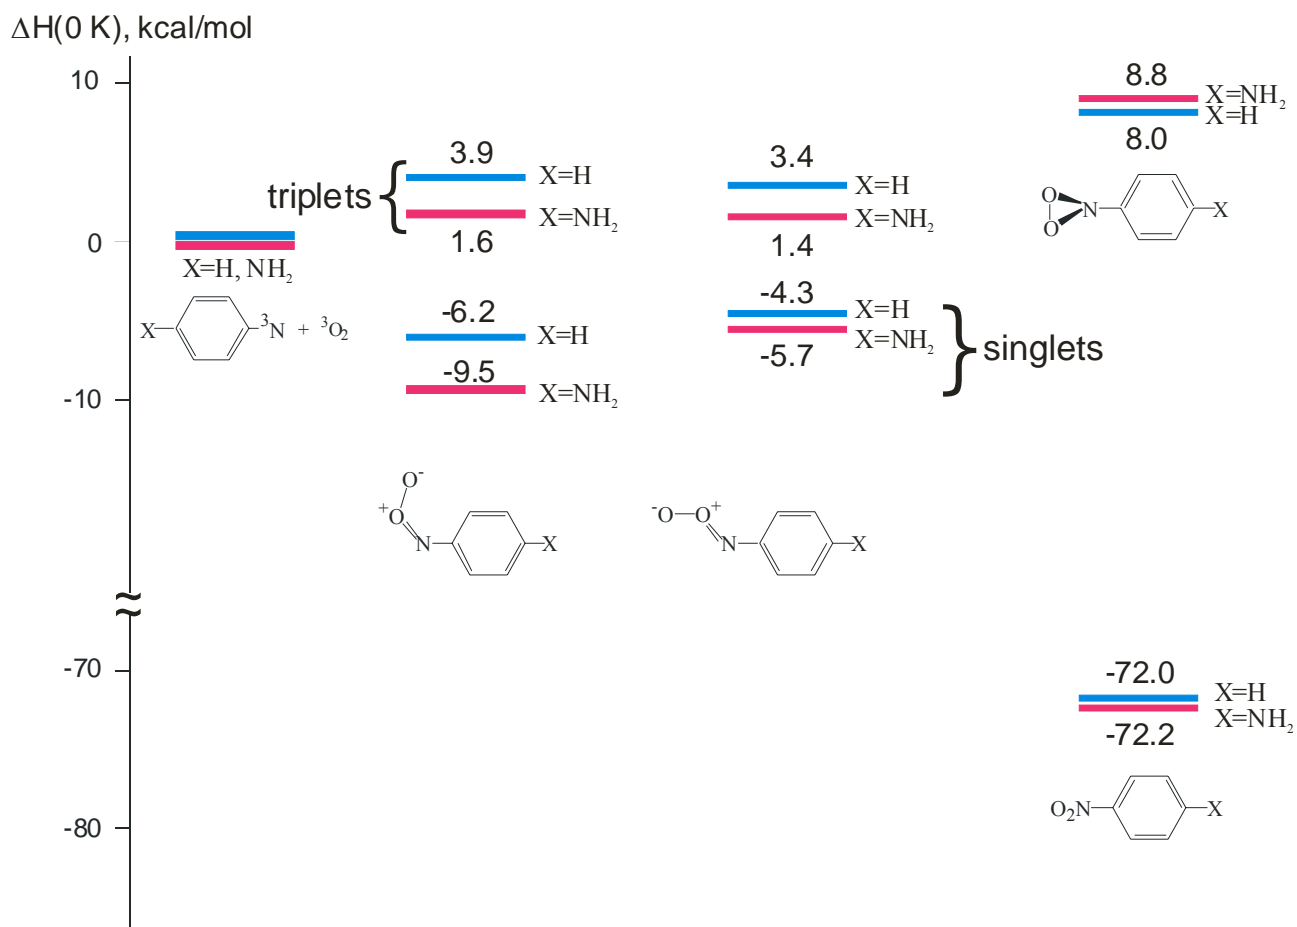

**Figure S5**

Relative 0 K enthalpies of the species involved in the formation and rearrangement of phenyl- and *p*-aminophenyl nitroso oxides calculated by the B3LYP/6-311G(d,p) method.

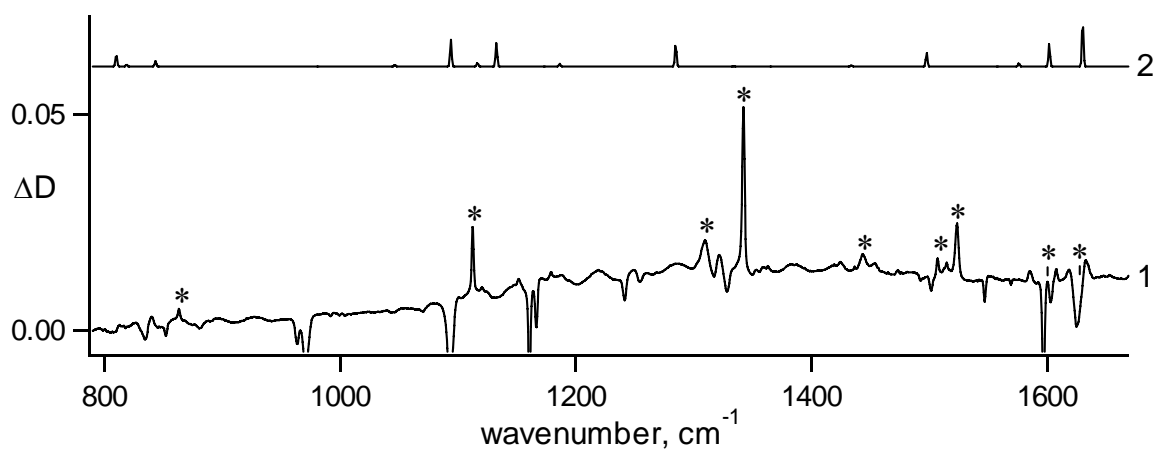

**Figure S6**

Difference IR spectrum produced by bleaching of the adducts of nitrene 4 with oxygen in an Ar matrix at 12 K to  $>515$  nm for 5 min (spectrum 1). The traces 2 show the IR spectra of cyclic p-aminophenylnitroso dioxaziridine calculated by B3LYP and scaled by 0.9614. The asterisks mark the positions of experimental IR peaks of p-nitroaniline (2) in an Ar matrix at 12 K.

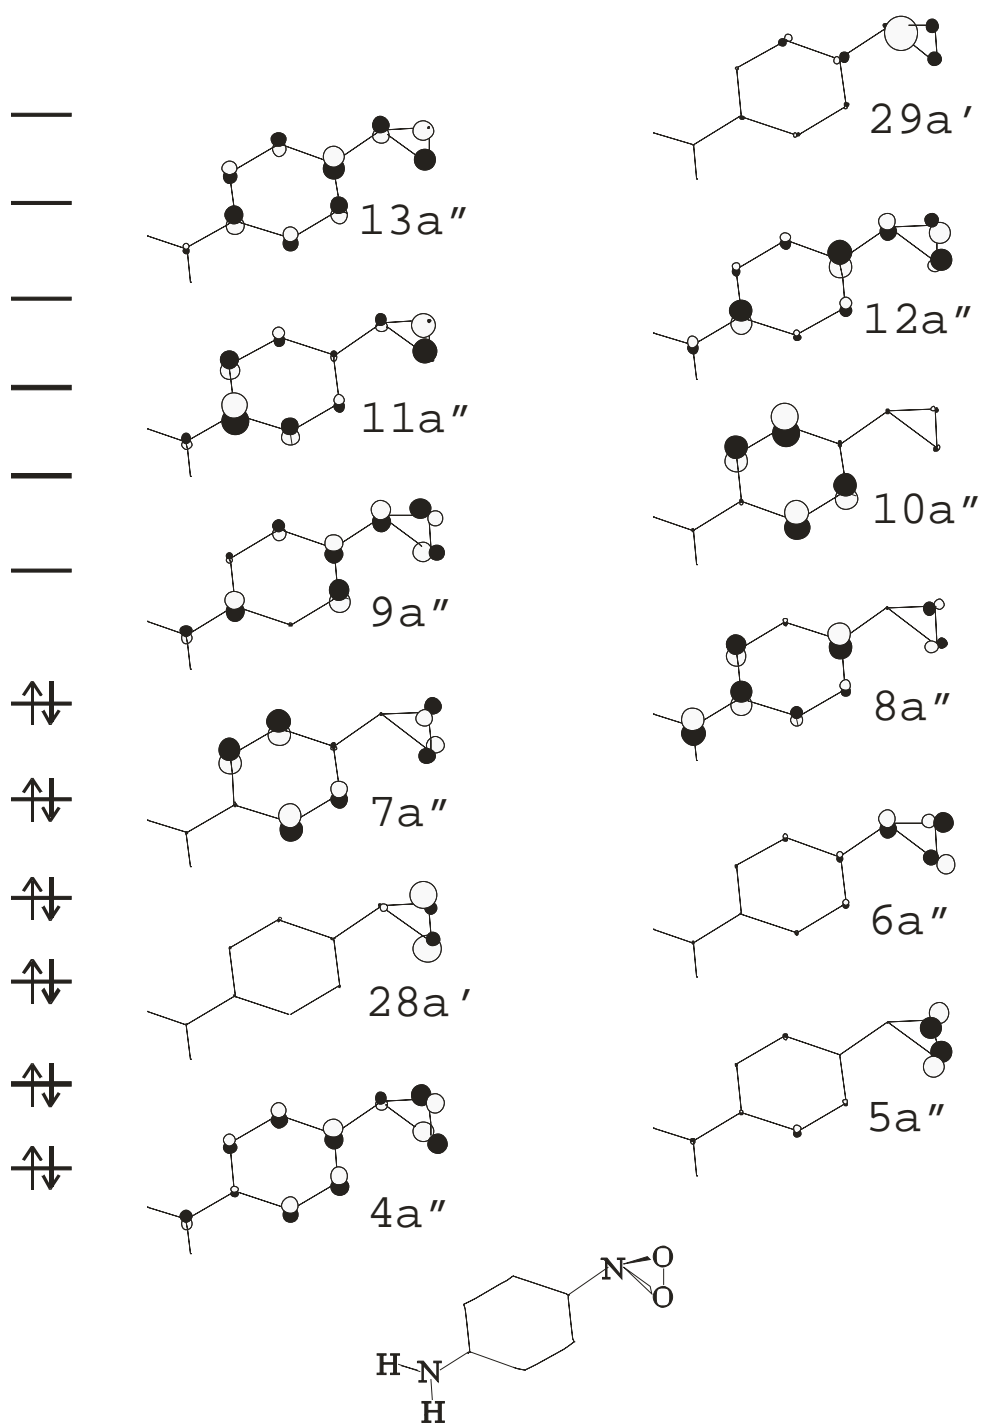

**Figure S7**

Active space used in the CASSCF/CASPT2 calculations of the electronic transitions of the cyclic *p*-aminophenyl dioxaziridine (cf. Table S10).
